# Supplementary material for: A Slow-Digesting Carbohydrate Diet during Rat Pregnancy Protects Offspring from Non-Alcoholic Fatty Liver Disease Risk through the Modulation of the Carbohydrate-Response Element and Sterol Regulatory Element Binding Proteins
Source: MDPI journal article supplement (doi:10.3390/nu11040844), 2019-04-14
Supplement: s1 [file s1]

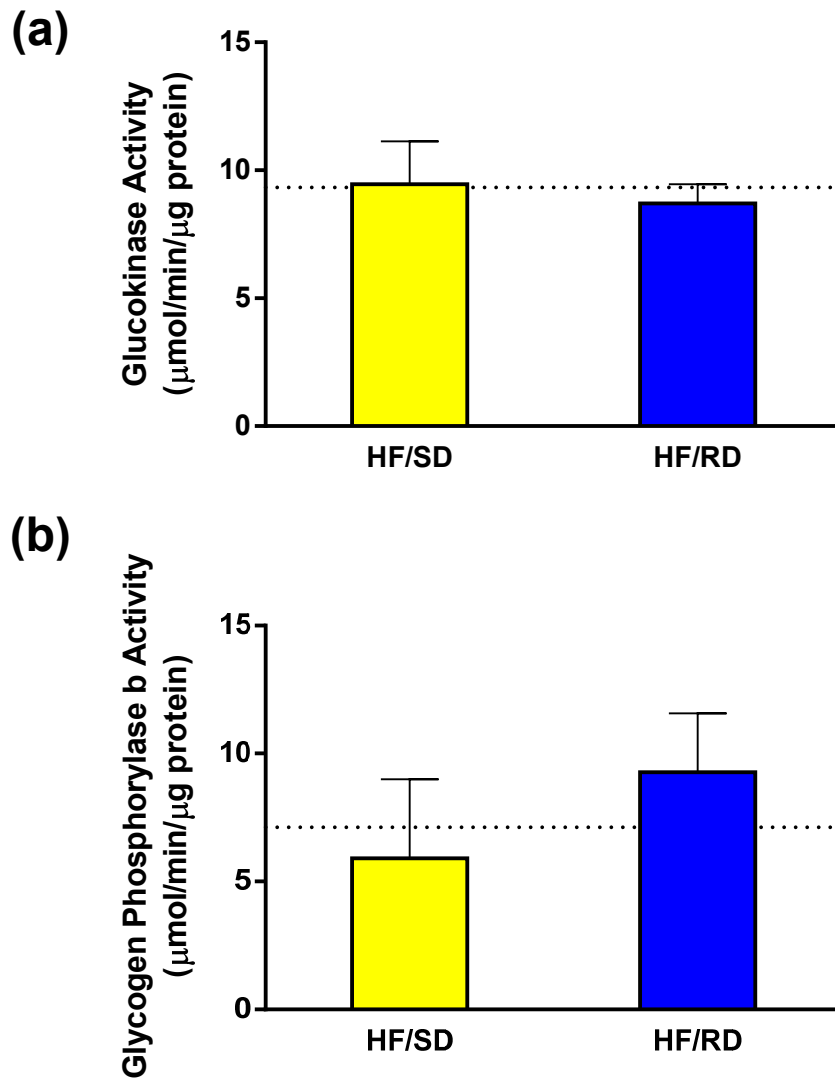

**Supplementary Figure S1.** (a) Glucokinase activity was measured in liver homogenates as described (Massa, L.; Baltrusch, S.; Okar, D. A.; Lange, A. J.; Lenzen, S.; Tiedge, M., Interaction of 6-phosphofructo-2-kinase/fructose-2, 6-bisphosphatase (PFK-2/FBPase-2) with glucokinase activates glucose phosphorylation and glucose metabolism in insulin-producing cells. *Diabetes* **2004**, 53, 1020-1029). (b) Glycogen Phosphorylase b activity was measured spectrophotometrically as described in Board, M.; Hadwen, M.; Johnson, L. N., Effects of novel analogues of D-glucose on glycogen phosphorylase activities in crude extracts of liver and skeletal muscle. *Eur. J. Biochem.* **1995**, 228, 753-761. Results are mean  $\pm$  SEM (n=6 animals per group). No significant differences were found among experimental groups
