# Supplementary material for: A Slow-Digesting Carbohydrate Diet during Rat Pregnancy Protects Offspring from Non-Alcoholic Fatty Liver Disease Risk through the Modulation of the Carbohydrate-Response Element and Sterol Regulatory Element Binding Proteins
Source: MDPI journal article supplement (doi:10.3390/nu11040844), 2019-04-14
Supplement: s1 [file s1]

## Supplemental Tables

Table S1. Experimental diets during rat pregnancy

|                                               | HF/SD Diet | HF/RD Diet | Reference |
|-----------------------------------------------|------------|------------|-----------|
| Total Protein (g/ 100 g diet)                 | 24.2       | 24.2       | 18.3      |
| Total Fat (g/ 100 g diet)                     | 20.5       | 20.5       | 7.0       |
| Total Carbohydrates (g/ 100 g diet)           | 49.1       | 49.4       | 64.6      |
| Slow Digesting simple Sugars                  |            |            |           |
| Isomaltulose <sup>a</sup>                     | 67.9       | -          | -         |
| Rapid Digesting simple Sugars                 |            |            |           |
| Sucrose <sup>a</sup>                          | 5.5        | 81.9       | 14.4      |
| Rapid Digesting Complex Carbohydrates         |            |            |           |
| Maltodextrin (DE 9-16) <sup>a</sup>           | 7.7        | -          | 78.4      |
| Resistant Starch                              |            |            |           |
| Resistant Maltodextrin Fibesol-2 <sup>a</sup> | 15.4       | -          | -         |
| Indigestible Fiber                            |            |            |           |
| Fructooligosaccharides <sup>a</sup>           | 3.5        | 18.1       | -         |
| Cellulose <sup>a</sup>                        | -          | -          | 7.2       |

<sup>a</sup> Individual carbohydrate composition is expressed as a percentage of total carbohydrates

Table S2. Glucose, insulin and glucagon levels in fasted serum samples from the different experimental groups (n=8):

|                   | HF/SD Group   | HF/RD Group    | Reference      |
|-------------------|---------------|----------------|----------------|
| Glycaemia (mg/dL) | 104.6 ± 5.0   | 119.0 ± 6.4    | 117.3 ± 12.8   |
| Insulin (pg/mL)   | 885.2 ± 174.6 | 1319.0 ± 307.7 | 1234.2 ± 315.5 |
| Glucagon (pg/mL)  | 29.4 ± 1.3    | 29.0 ± 2.1     | 22.5 ± 1.2     |

There are no significant differences among groups.

Table S3. Heat map showing relevant changes in liver lipids.

| Individual Notation<br>or Probable ID | Class                | Subclass A | Mean<br>HF/RD | SEM  | Mean<br>HF/SD | SEM  | Student's<br>t-test (p) | Fold<br>Change | Log <sub>2</sub> (fold<br>change) |
|---------------------------------------|----------------------|------------|---------------|------|---------------|------|-------------------------|----------------|-----------------------------------|
| 12:0                                  | Fatty acids          | SFA        | 0.34          | 0.04 | 0.37          | 0.05 | 6.51E-01                | 0.92           | -0.12                             |
| 14:0                                  | Fatty acids          | SFA        | 0.37          | 0.02 | 0.39          | 0.03 | 6.35E-01                | 0.96           | -0.06                             |
| 16:0                                  | Fatty acids          | SFA        | 0.80          | 0.05 | 0.82          | 0.04 | 7.90E-01                | 0.98           | -0.03                             |
| 17:0                                  | Fatty acids          | SFA        | 0.63          | 0.05 | 0.79          | 0.05 | 2.95E-02                | 0.79           | -0.34                             |
| 18:0                                  | Fatty acids          | SFA        | 0.96          | 0.04 | 0.92          | 0.05 | 5.06E-01                | 1.05           | 0.07                              |
| 16:1n-x                               | Fatty acids          | MUFA       | 0.80          | 0.19 | 0.54          | 0.05 | 2.38E-01                | 1.47           | 0.56                              |
| 16:3n-x                               | Fatty acids          | MUFA       | 0.64          | 0.09 | 0.61          | 0.06 | 8.21E-01                | 1.04           | 0.06                              |
| 18:2n-x                               | Fatty acids          | MUFA       | 0.97          | 0.07 | 1.09          | 0.17 | 5.47E-01                | 0.90           | -0.16                             |
| 20:2n-x                               | Fatty acids          | MUFA       | 0.23          | 0.04 | 0.26          | 0.04 | 5.34E-01                | 0.86           | -0.22                             |
| 20:3n-x                               | Fatty acids          | MUFA       | 0.13          | 0.01 | 0.20          | 0.02 | 7.81E-03                | 0.65           | -0.62                             |
| 20:4n-x                               | Fatty acids          | PUFA       | 0.19          | 0.08 | 0.24          | 0.03 | 5.61E-01                | 0.80           | -0.32                             |
| AC(8:1n-x)                            | Fatty esters         | PUFA       | 0.34          | 0.02 | 0.58          | 0.05 | 7.12E-04                | 0.57           | -0.80                             |
| AC(10:1n-x)                           | Fatty esters         | PUFA       | 0.77          | 0.08 | 0.63          | 0.07 | 2.08E-01                | 1.22           | 0.28                              |
| PE(18:3/0:0)                          | Glycerophospholipids | PUFA       | 0.80          | 0.24 | 1.32          | 0.31 | 2.10E-01                | 0.60           | -0.73                             |
| PE(18:3/0:0)                          | Glycerophospholipids | PUFA       | 1.45          | 0.27 | 2.08          | 0.24 | 1.08E-01                | 0.70           | -0.52                             |
| LPE(20:5)                             | Glycerophospholipids | PUFA       | 1.01          | 0.08 | 1.27          | 0.07 | 3.95E-02                | 0.80           | -0.32                             |
| PE(22:5/0:0)                          | Glycerophospholipids | PUFA       | 0.92          | 0.05 | 0.90          | 0.05 | 7.47E-01                | 1.03           | 0.04                              |
| PE(22:5/0:0)                          | Glycerophospholipids | PUFA       | 1.32          | 0.26 | 1.49          | 0.16 | 5.94E-01                | 0.89           | -0.17                             |
| PE(22:5/0:0)                          | Glycerophospholipids | PUFA       | 0.63          | 0.09 | 0.51          | 0.06 | 2.86E-01                | 1.24           | 0.31                              |
| PE(22:5/0:0)                          | Glycerophospholipids | PUFA       | 0.92          | 0.24 | 0.78          | 0.16 | 6.23E-01                | 1.19           | 0.25                              |
| PE(0:0/16:1)                          | Glycerophospholipids | PUFA       | 1.81          | 0.16 | 1.91          | 0.19 | 6.97E-01                | 0.95           | -0.08                             |
| 11-HETE                               | Oxidized fatty acids | PUFA       | 0.43          | 0.03 | 0.43          | 0.04 | 9.97E-01                | 1.00           | 0.00                              |
| 12-HETE                               | Oxidized fatty acids | PUFA       | 0.03          | 0.01 | 0.03          | 0.01 | 5.38E-01                | 0.80           | -0.32                             |
| 13-HODE                               | Oxidized fatty acids | PUFA       | 0.20          | 0.01 | 0.28          | 0.02 | 1.71E-03                | 0.71           | -0.50                             |
| 15-HETE                               | Oxidized fatty acids | PUFA       | 0.16          | 0.02 | 0.16          | 0.01 | 7.58E-01                | 1.04           | 0.06                              |
| 16:1n-7                               | Fatty acids          | PUFA       | 1.73          | 0.24 | 1.56          | 0.12 | 5.50E-01                | 1.11           | 0.15                              |
| 16:1n-9                               | Fatty acids          | PUFA       | 0.78          | 0.08 | 1.14          | 0.11 | 2.47E-02                | 0.69           | -0.54                             |
| 18:1n-9                               | Fatty acids          | PUFA       | 0.76          | 0.07 | 0.93          | 0.06 | 8.10E-02                | 0.81           | -0.30                             |
| 18:2n-6                               | Fatty acids          | oxFA       | 0.51          | 0.05 | 0.85          | 0.07 | 1.64E-03                | 0.60           | -0.74                             |
| 18:3n-3                               | Fatty acids          | oxFA       | 0.52          | 0.08 | 0.82          | 0.06 | 8.25E-03                | 0.64           | -0.65                             |
| 18:3n-6                               | Fatty acids          | oxFA       | 0.66          | 0.08 | 0.93          | 0.07 | 2.50E-02                | 0.71           | -0.49                             |
| 18:4n-3                               | Fatty acids          | oxFA       | 0.66          | 0.10 | 1.39          | 0.19 | 5.04E-03                | 0.47           | -1.07                             |
| 20:1n-6                               | Fatty acids          | oxFA       | 0.47          | 0.01 | 0.65          | 0.05 | 8.55E-03                | 0.72           | -0.47                             |
| 20:3n-3                               | Fatty acids          | oxFA       | 0.37          | 0.02 | 0.34          | 0.02 | 4.47E-01                | 1.06           | 0.09                              |
| 20:3n-9                               | Fatty acids          | oxFA       | 0.38          | 0.03 | 0.41          | 0.05 | 5.21E-01                | 0.91           | -0.14                             |
| 20:4n-3                               | Fatty acids          | AC         | 0.10          | 0.01 | 0.17          | 0.02 | 4.85E-03                | 0.57           | -0.80                             |

|                                       |                      |    |      |      |      |      |          |      |       |
|---------------------------------------|----------------------|----|------|------|------|------|----------|------|-------|
| 20:4n-6                               | Fatty acids          | AC | 0.64 | 0.02 | 0.75 | 0.05 | 8.31E-02 | 0.85 | -0.23 |
| 20:5n-3                               | Fatty acids          | DG | 0.55 | 0.07 | 0.76 | 0.04 | 1.67E-02 | 0.73 | -0.46 |
| 22:4n-6                               | Fatty acids          | DG | 0.25 | 0.03 | 0.20 | 0.02 | 1.60E-01 | 1.25 | 0.32  |
| 22:5n-3                               | Fatty acids          | DG | 0.30 | 0.01 | 0.34 | 0.02 | 2.02E-01 | 0.90 | -0.16 |
| 22:5n-6                               | Fatty acids          | DG | 0.27 | 0.04 | 0.23 | 0.03 | 5.14E-01 | 1.14 | 0.18  |
| 22:6n-3                               | Fatty acids          | DG | 0.63 | 0.04 | 0.64 | 0.04 | 8.33E-01 | 0.98 | -0.03 |
| Cer(42:3)                             | Sphingolipids        | DG | 0.49 | 0.03 | 0.53 | 0.03 | 3.12E-01 | 0.92 | -0.12 |
| Cer(d18:1/16:0)                       | Sphingolipids        | DG | 0.97 | 0.06 | 0.93 | 0.06 | 7.01E-01 | 1.04 | 0.05  |
| Cer(d18:1/23:0)                       | Sphingolipids        | DG | 0.96 | 0.06 | 1.00 | 0.08 | 7.08E-01 | 0.96 | -0.05 |
| Cer(d18:1/24:0)                       | Sphingolipids        | DG | 0.93 | 0.05 | 0.93 | 0.07 | 9.44E-01 | 0.99 | -0.01 |
| Cer(d18:1/24:1)                       | Sphingolipids        | DG | 1.08 | 0.06 | 0.99 | 0.08 | 3.98E-01 | 1.09 | 0.12  |
| CMH(d18:1/22:0)                       | Sphingolipids        | TG | 0.68 | 0.05 | 0.62 | 0.04 | 3.29E-01 | 1.10 | 0.14  |
| CMH(d18:1/24:0)                       | Sphingolipids        | TG | 0.70 | 0.08 | 0.80 | 0.06 | 3.25E-01 | 0.88 | -0.19 |
| ChoE(20:4)                            | Sterols              | TG | 1.31 | 0.08 | 1.17 | 0.15 | 4.06E-01 | 1.12 | 0.16  |
| ChoE(20:5)                            | Sterols              | TG | 1.45 | 0.11 | 1.63 | 0.29 | 5.95E-01 | 0.90 | -0.16 |
| ChoE(22:4)                            | Sterols              | TG | 0.87 | 0.09 | 1.15 | 0.23 | 2.80E-01 | 0.75 | -0.41 |
| ChoE(22:5)                            | Sterols              | TG | 0.67 | 0.07 | 1.07 | 0.26 | 1.83E-01 | 0.62 | -0.68 |
| ChoE(22:6)                            | Sterols              | TG | 1.15 | 0.13 | 1.12 | 0.16 | 8.52E-01 | 1.04 | 0.05  |
| Cholic acid                           | Bile acids           | TG | 2.06 | 1.34 | 2.94 | 2.69 | 7.75E-01 | 0.70 | -0.51 |
| DG(32:0)                              | Glycerolipids        | TG | 1.89 | 0.31 | 0.73 | 0.08 | 6.87E-03 | 2.60 | 1.38  |
| DG(32:1)                              | Glycerolipids        | TG | 1.68 | 0.28 | 0.78 | 0.10 | 1.61E-02 | 2.15 | 1.10  |
| DG(32:2)                              | Glycerolipids        | TG | 0.78 | 0.11 | 0.55 | 0.07 | 9.28E-02 | 1.44 | 0.52  |
| DG(34:0)                              | Glycerolipids        | TG | 1.13 | 0.08 | 0.80 | 0.04 | 4.71E-03 | 1.42 | 0.50  |
| DG(34:1)                              | Glycerolipids        | TG | 1.69 | 0.23 | 0.97 | 0.09 | 1.77E-02 | 1.75 | 0.81  |
| DG(34:2)                              | Glycerolipids        | TG | 1.12 | 0.12 | 1.01 | 0.05 | 4.33E-01 | 1.11 | 0.15  |
| DG(36:2)                              | Glycerolipids        | TG | 0.97 | 0.07 | 1.00 | 0.08 | 7.86E-01 | 0.97 | -0.04 |
| DG(36:3)                              | Glycerolipids        | TG | 0.64 | 0.07 | 1.02 | 0.06 | 1.26E-03 | 0.63 | -0.68 |
| DG(36:4)                              | Glycerolipids        | TG | 0.44 | 0.09 | 0.87 | 0.11 | 7.19E-03 | 0.50 | -0.99 |
| DG(36:4)                              | Glycerolipids        | TG | 1.17 | 0.08 | 1.19 | 0.10 | 9.28E-01 | 0.99 | -0.01 |
| Hydroxy-eicosatetraenoic acids (HETE) | Oxidized fatty acids | TG | 0.62 | 0.05 | 0.62 | 0.04 | 9.95E-01 | 1.00 | 0.00  |
| PC(0:0/14:0)                          | Glycerophospholipids | TG | 0.33 | 0.04 | 0.43 | 0.04 | 9.70E-02 | 0.76 | -0.39 |
| PC(0:0/15:0)                          | Glycerophospholipids | TG | 0.78 | 0.07 | 1.18 | 0.05 | 5.34E-04 | 0.66 | -0.59 |
| PC(0:0/16:1)                          | Glycerophospholipids | TG | 1.74 | 0.17 | 1.59 | 0.18 | 5.47E-01 | 1.09 | 0.13  |
| PC(0:0/18:0)                          | Glycerophospholipids | TG | 1.26 | 0.14 | 1.35 | 0.10 | 6.52E-01 | 0.94 | -0.09 |
| PC(0:0/18:1)                          | Glycerophospholipids | TG | 1.26 | 0.06 | 1.26 | 0.08 | 9.99E-01 | 1.00 | 0.00  |
| PC(0:0/18:2)                          | Glycerophospholipids | TG | 0.77 | 0.06 | 1.06 | 0.03 | 1.08E-03 | 0.72 | -0.48 |
| PC(0:0/18:3)                          | Glycerophospholipids | TG | 0.60 | 0.05 | 0.75 | 0.08 | 1.27E-01 | 0.80 | -0.32 |
| PC(0:0/20:0)                          | Glycerophospholipids | TG | 0.75 | 0.11 | 1.07 | 0.10 | 4.75E-02 | 0.70 | -0.51 |
| PC(0:0/20:2)                          | Glycerophospholipids | TG | 0.57 | 0.03 | 0.67 | 0.04 | 1.12E-01 | 0.86 | -0.21 |
| PC(0:0/20:3)                          | Glycerophospholipids | TG | 0.94 | 0.09 | 0.96 | 0.09 | 8.49E-01 | 0.97 | -0.04 |

|               |                      |      |      |      |      |      |          |      |       |
|---------------|----------------------|------|------|------|------|------|----------|------|-------|
| PC(0:0/20:4)  | Glycerophospholipids | TG   | 1.14 | 0.06 | 1.12 | 0.05 | 8.92E-01 | 1.01 | 0.01  |
| PC(0:0/20:5)  | Glycerophospholipids | TG   | 1.13 | 0.11 | 1.17 | 0.08 | 7.70E-01 | 0.96 | -0.05 |
| PC(0:0/22:4)  | Glycerophospholipids | TG   | 0.79 | 0.08 | 0.61 | 0.04 | 5.31E-02 | 1.31 | 0.39  |
| PC(0:0/22:5)  | Glycerophospholipids | TG   | 1.16 | 0.20 | 1.21 | 0.18 | 8.57E-01 | 0.96 | -0.06 |
| PC(0:0/22:5)  | Glycerophospholipids | TG   | 0.77 | 0.14 | 0.45 | 0.04 | 6.75E-02 | 1.71 | 0.77  |
| PC(0:0/22:6)  | Glycerophospholipids | TG   | 0.90 | 0.13 | 0.69 | 0.04 | 1.68E-01 | 1.31 | 0.39  |
| PC(14:0/0:0)  | Glycerophospholipids | TG   | 0.34 | 0.03 | 0.41 | 0.04 | 2.10E-01 | 0.84 | -0.25 |
| PC(14:0/18:2) | Glycerophospholipids | TG   | 0.25 | 0.02 | 0.35 | 0.04 | 6.02E-02 | 0.73 | -0.45 |
| PC(14:0/20:4) | Glycerophospholipids | TG   | 0.41 | 0.04 | 0.49 | 0.04 | 1.64E-01 | 0.83 | -0.27 |
| PC(15:0/0:0)  | Glycerophospholipids | TG   | 0.74 | 0.06 | 1.03 | 0.04 | 1.09E-03 | 0.72 | -0.47 |
| PC(15:0/18:2) | Glycerophospholipids | TG   | 0.67 | 0.12 | 1.19 | 0.10 | 5.54E-03 | 0.56 | -0.84 |
| PC(15:0/20:4) | Glycerophospholipids | TG   | 0.90 | 0.08 | 1.34 | 0.09 | 2.66E-03 | 0.67 | -0.57 |
| PC(15:0/22:6) | Glycerophospholipids | TG   | 0.45 | 0.04 | 0.61 | 0.05 | 2.84E-02 | 0.74 | -0.43 |
| PC(16:0/0:0)  | Glycerophospholipids | TG   | 1.00 | 0.04 | 1.07 | 0.04 | 2.53E-01 | 0.94 | -0.09 |
| PC(16:0/16:0) | Glycerophospholipids | TG   | 0.82 | 0.03 | 0.88 | 0.04 | 2.29E-01 | 0.93 | -0.11 |
| PC(16:0/17:0) | Glycerophospholipids | TG   | 1.19 | 0.07 | 1.44 | 0.16 | 1.72E-01 | 0.83 | -0.27 |
| PC(16:0/18:0) | Glycerophospholipids | TG   | 0.93 | 0.05 | 0.95 | 0.03 | 8.05E-01 | 0.98 | -0.02 |
| PC(16:0/18:1) | Glycerophospholipids | TG   | 1.21 | 0.08 | 1.17 | 0.07 | 6.98E-01 | 1.04 | 0.05  |
| PC(16:0/18:2) | Glycerophospholipids | TG   | 0.90 | 0.07 | 1.11 | 0.04 | 2.98E-02 | 0.81 | -0.30 |
| PC(16:0/19:1) | Glycerophospholipids | TG   | 0.74 | 0.04 | 0.94 | 0.05 | 1.04E-02 | 0.79 | -0.35 |
| PC(16:0/20:4) | Glycerophospholipids | TG   | 1.11 | 0.07 | 1.10 | 0.02 | 8.85E-01 | 1.01 | 0.01  |
| PC(16:0/20:5) | Glycerophospholipids | TG   | 1.03 | 0.13 | 1.41 | 0.07 | 2.88E-02 | 0.73 | -0.45 |
| PC(16:0/22:6) | Glycerophospholipids | TG   | 0.78 | 0.07 | 0.72 | 0.04 | 4.81E-01 | 1.08 | 0.11  |
| PC(16:1/0:0)  | Glycerophospholipids | TG   | 1.65 | 0.16 | 1.68 | 0.19 | 9.16E-01 | 0.98 | -0.02 |
| PC(17:0/18:2) | Glycerophospholipids | TG   | 0.55 | 0.10 | 1.05 | 0.10 | 3.77E-03 | 0.52 | -0.94 |
| PC(17:0/20:3) | Glycerophospholipids | TG   | 0.58 | 0.06 | 0.88 | 0.11 | 3.36E-02 | 0.66 | -0.60 |
| PC(17:0/20:4) | Glycerophospholipids | TG   | 1.21 | 0.12 | 1.81 | 0.18 | 1.39E-02 | 0.67 | -0.58 |
| PC(17:0/20:4) | Glycerophospholipids | TG   | 0.89 | 0.08 | 1.23 | 0.10 | 1.99E-02 | 0.72 | -0.47 |
| PC(17:1/18:1) | Glycerophospholipids | TG   | 0.83 | 0.12 | 1.68 | 0.27 | 9.84E-03 | 0.49 | -1.02 |
| PC(17:1/18:2) | Glycerophospholipids | TG   | 0.67 | 0.14 | 1.21 | 0.13 | 1.43E-02 | 0.55 | -0.86 |
| PC(18:0/0:0)  | Glycerophospholipids | TG   | 1.07 | 0.04 | 1.05 | 0.05 | 7.89E-01 | 1.02 | 0.02  |
| PC(18:0/18:1) | Glycerophospholipids | TG   | 1.31 | 0.08 | 1.16 | 0.09 | 2.82E-01 | 1.12 | 0.17  |
| PC(18:0/18:2) | Glycerophospholipids | TG   | 0.74 | 0.05 | 0.96 | 0.05 | 1.04E-02 | 0.77 | -0.37 |
| PC(18:0/20:3) | Glycerophospholipids | TG   | 0.79 | 0.07 | 0.86 | 0.08 | 5.43E-01 | 0.92 | -0.12 |
| PC(18:0/20:4) | Glycerophospholipids | TG   | 1.09 | 0.04 | 1.03 | 0.03 | 2.73E-01 | 1.06 | 0.09  |
| PC(18:0/22:4) | Glycerophospholipids | TG   | 0.53 | 0.05 | 0.47 | 0.03 | 3.23E-01 | 1.13 | 0.18  |
| PC(18:0/22:5) | Glycerophospholipids | TG   | 0.70 | 0.04 | 0.78 | 0.03 | 1.32E-01 | 0.90 | -0.15 |
| PC(18:0/22:6) | Glycerophospholipids | TG   | 0.95 | 0.09 | 0.75 | 0.02 | 7.16E-02 | 1.27 | 0.34  |
| PC(18:1/0:0)  | Glycerophospholipids | TG   | 1.12 | 0.06 | 1.40 | 0.06 | 5.52E-03 | 0.80 | -0.33 |
| PC(18:1/22:6) | Glycerophospholipids | ChoE | 1.10 | 0.07 | 1.21 | 0.06 | 2.79E-01 | 0.91 | -0.13 |
| PC(18:2/0:0)  | Glycerophospholipids | ChoE | 0.76 | 0.13 | 1.00 | 0.05 | 1.25E-01 | 0.76 | -0.39 |

|                 |                      |      |      |      |      |      |          |      |       |
|-----------------|----------------------|------|------|------|------|------|----------|------|-------|
| PC(18:2/0:0)    | Glycerophospholipids | ChoE | 1.00 | 0.13 | 1.01 | 0.08 | 9.74E-01 | 0.99 | -0.01 |
| PC(18:2/18:2)   | Glycerophospholipids | ChoE | 0.43 | 0.11 | 0.82 | 0.07 | 1.14E-02 | 0.52 | -0.94 |
| PC(18:2/20:4)   | Glycerophospholipids | ChoE | 0.63 | 0.09 | 0.80 | 0.08 | 1.81E-01 | 0.79 | -0.34 |
| PC(18:3/0:0)    | Glycerophospholipids | BA   | 1.18 | 0.26 | 1.26 | 0.11 | 7.85E-01 | 0.94 | -0.09 |
| PC(18:3/18:3)   | Glycerophospholipids | BA   | 0.22 | 0.03 | 0.23 | 0.02 | 7.89E-01 | 0.96 | -0.07 |
| PC(19:1/18:2)   | Glycerophospholipids | BA   | 0.54 | 0.12 | 1.24 | 0.17 | 4.33E-03 | 0.44 | -1.20 |
| PC(20:0/0:0)    | Glycerophospholipids | PE   | 0.66 | 0.02 | 0.90 | 0.05 | 7.15E-04 | 0.74 | -0.44 |
| PC(20:0/18:2)   | Glycerophospholipids | PE   | 0.52 | 0.02 | 0.70 | 0.05 | 3.54E-03 | 0.74 | -0.44 |
| PC(20:0/20:4)   | Glycerophospholipids | PE   | 1.07 | 0.06 | 1.48 | 0.14 | 1.53E-02 | 0.72 | -0.46 |
| PC(20:1/0:0)    | Glycerophospholipids | PE   | 0.86 | 0.04 | 1.21 | 0.07 | 1.28E-03 | 0.71 | -0.49 |
| PC(20:2/0:0)    | Glycerophospholipids | PE   | 0.41 | 0.03 | 0.53 | 0.02 | 7.90E-03 | 0.77 | -0.38 |
| PC(20:3/0:0)    | Glycerophospholipids | PE   | 0.93 | 0.19 | 1.01 | 0.10 | 7.01E-01 | 0.92 | -0.12 |
| PC(20:3/0:0)    | Glycerophospholipids | PE   | 0.85 | 0.11 | 0.94 | 0.11 | 5.74E-01 | 0.91 | -0.14 |
| PC(20:4/0:0)    | Glycerophospholipids | PE   | 1.54 | 0.31 | 1.56 | 0.16 | 9.52E-01 | 0.99 | -0.02 |
| PC(20:5/0:0)    | Glycerophospholipids | PE   | 1.34 | 0.39 | 1.49 | 0.16 | 7.23E-01 | 0.90 | -0.16 |
| PC(22:4/0:0)    | Glycerophospholipids | PE   | 0.74 | 0.16 | 0.72 | 0.11 | 8.89E-01 | 1.04 | 0.05  |
| PC(22:4/20:4)   | Glycerophospholipids | PE   | 0.31 | 0.03 | 0.34 | 0.02 | 3.32E-01 | 0.89 | -0.17 |
| PC(22:5/0:0)    | Glycerophospholipids | PE   | 0.89 | 0.20 | 0.93 | 0.13 | 8.90E-01 | 0.96 | -0.05 |
| PC(22:5/0:0)    | Glycerophospholipids | PE   | 0.77 | 0.22 | 0.66 | 0.14 | 6.77E-01 | 1.17 | 0.22  |
| PC(22:6/0:0)    | Glycerophospholipids | PE   | 1.16 | 0.28 | 1.09 | 0.15 | 8.32E-01 | 1.06 | 0.09  |
| PC(32:1)        | Glycerophospholipids | PE   | 1.39 | 0.11 | 1.14 | 0.14 | 1.84E-01 | 1.22 | 0.28  |
| PC(33:1)        | Glycerophospholipids | PE   | 1.07 | 0.08 | 1.32 | 0.10 | 6.67E-02 | 0.81 | -0.30 |
| PC(37:2)        | Glycerophospholipids | PE   | 0.95 | 0.16 | 2.14 | 0.47 | 4.42E-02 | 0.44 | -1.18 |
| PC(37:2)        | Glycerophospholipids | PE   | 0.50 | 0.08 | 1.01 | 0.09 | 1.05E-03 | 0.50 | -1.00 |
| PC(37:5)        | Glycerophospholipids | PE   | 0.76 | 0.11 | 1.13 | 0.08 | 1.73E-02 | 0.67 | -0.57 |
| PC(38:5)        | Glycerophospholipids | PE   | 0.94 | 0.05 | 1.13 | 0.06 | 2.25E-02 | 0.83 | -0.26 |
| PC(38:5)        | Glycerophospholipids | LPE  | 0.43 | 0.07 | 0.35 | 0.07 | 4.83E-01 | 1.20 | 0.26  |
| PC(40:5)        | Glycerophospholipids | LPE  | 0.60 | 0.09 | 0.39 | 0.04 | 6.95E-02 | 1.53 | 0.62  |
| PC(40:8)        | Glycerophospholipids | LPE  | 0.95 | 0.06 | 0.98 | 0.15 | 8.65E-01 | 0.97 | -0.04 |
| PC(O-16:0/0:0)  | Glycerophospholipids | LPE  | 0.87 | 0.06 | 0.90 | 0.07 | 8.11E-01 | 0.98 | -0.04 |
| PC(O-16:0/14:0) | Glycerophospholipids | LPE  | 0.22 | 0.03 | 0.23 | 0.02 | 5.91E-01 | 0.92 | -0.12 |
| PC(O-16:0/16:0) | Glycerophospholipids | LPE  | 0.97 | 0.04 | 1.04 | 0.03 | 2.04E-01 | 0.93 | -0.10 |
| PC(O-16:0/18:2) | Glycerophospholipids | LPE  | 0.53 | 0.04 | 0.68 | 0.05 | 3.31E-02 | 0.78 | -0.36 |
| PC(O-16:0/20:4) | Glycerophospholipids | LPE  | 0.85 | 0.05 | 0.86 | 0.03 | 8.56E-01 | 0.99 | -0.02 |
| PC(O-16:0/22:4) | Glycerophospholipids | LPE  | 0.73 | 0.06 | 0.59 | 0.04 | 7.37E-02 | 1.23 | 0.30  |
| PC(O-18:0/0:0)  | Glycerophospholipids | LPE  | 0.88 | 0.05 | 0.90 | 0.07 | 8.01E-01 | 0.98 | -0.04 |
| PC(O-18:0/20:4) | Glycerophospholipids | LPE  | 0.91 | 0.05 | 0.91 | 0.03 | 9.51E-01 | 1.00 | 0.01  |
| PC(O-18:1/0:0)  | Glycerophospholipids | LPE  | 0.82 | 0.05 | 0.86 | 0.07 | 6.59E-01 | 0.95 | -0.07 |
| PC(O-18:1/18:2) | Glycerophospholipids | LPE  | 0.50 | 0.04 | 0.64 | 0.04 | 2.00E-02 | 0.77 | -0.38 |
| PC(O-18:1/20:4) | Glycerophospholipids | LPE  | 0.83 | 0.04 | 0.88 | 0.02 | 3.96E-01 | 0.95 | -0.07 |
| PC(O-18:1/20:4) | Glycerophospholipids | LPE  | 0.85 | 0.07 | 0.89 | 0.03 | 6.33E-01 | 0.96 | -0.06 |

|                 |                      |     |      |      |      |      |          |      |       |
|-----------------|----------------------|-----|------|------|------|------|----------|------|-------|
| PC(O-18:1/22:4) | Glycerophospholipids | LPE | 0.60 | 0.06 | 0.55 | 0.05 | 5.18E-01 | 1.09 | 0.13  |
| PC(O-20:0/0:0)  | Glycerophospholipids | LPE | 0.90 | 0.07 | 0.83 | 0.04 | 4.30E-01 | 1.08 | 0.11  |
| PC(O-34:0)      | Glycerophospholipids | LPE | 1.04 | 0.05 | 0.99 | 0.06 | 5.30E-01 | 1.05 | 0.07  |
| PC(O-34:1)      | Glycerophospholipids | LPE | 0.83 | 0.03 | 0.89 | 0.03 | 1.42E-01 | 0.93 | -0.10 |
| PC(P-16:0/0:0)  | Glycerophospholipids | LPE | 0.79 | 0.08 | 0.86 | 0.06 | 4.53E-01 | 0.91 | -0.13 |
| PC(P-16:0/16:0) | Glycerophospholipids | LPE | 0.91 | 0.05 | 1.03 | 0.04 | 7.69E-02 | 0.89 | -0.17 |
| PC(P-16:0/20:4) | Glycerophospholipids | LPE | 0.73 | 0.07 | 0.86 | 0.03 | 9.39E-02 | 0.84 | -0.25 |
| PC(P-16:0/22:6) | Glycerophospholipids | LPE | 0.44 | 0.08 | 0.40 | 0.03 | 7.15E-01 | 1.08 | 0.11  |
| PC(P-18:0/20:4) | Glycerophospholipids | LPE | 0.57 | 0.06 | 0.57 | 0.06 | 9.81E-01 | 1.00 | 0.01  |
| PC(P-18:0/20:4) | Glycerophospholipids | LPE | 0.89 | 0.09 | 0.85 | 0.06 | 7.20E-01 | 1.05 | 0.07  |
| PE(0:0/16:0)    | Glycerophospholipids | LPE | 1.37 | 0.23 | 1.74 | 0.22 | 2.63E-01 | 0.79 | -0.35 |
| PE(0:0/18:0)    | Glycerophospholipids | LPE | 1.32 | 0.23 | 1.56 | 0.23 | 4.77E-01 | 0.85 | -0.24 |
| PE(0:0/18:2)    | Glycerophospholipids | LPE | 0.88 | 0.11 | 1.51 | 0.09 | 9.97E-04 | 0.58 | -0.77 |
| PE(0:0/20:4)    | Glycerophospholipids | PC  | 1.07 | 0.04 | 1.17 | 0.04 | 1.26E-01 | 0.92 | -0.13 |
| PE(0:0/22:6)    | Glycerophospholipids | PC  | 1.05 | 0.09 | 0.93 | 0.06 | 3.10E-01 | 1.13 | 0.17  |
| PE(14:0/0:0)    | Glycerophospholipids | PC  | 0.38 | 0.02 | 0.51 | 0.04 | 1.75E-02 | 0.76 | -0.40 |
| PE(16:0/0:0)    | Glycerophospholipids | PC  | 1.10 | 0.08 | 1.23 | 0.06 | 2.14E-01 | 0.89 | -0.16 |
| PE(16:0/18:1)   | Glycerophospholipids | PC  | 1.46 | 0.08 | 1.62 | 0.16 | 3.66E-01 | 0.90 | -0.15 |
| PE(16:0/18:2)   | Glycerophospholipids | PC  | 1.07 | 0.13 | 1.68 | 0.13 | 5.16E-03 | 0.64 | -0.65 |
| PE(16:0/20:4)   | Glycerophospholipids | PC  | 1.27 | 0.06 | 1.30 | 0.05 | 7.31E-01 | 0.98 | -0.03 |
| PE(16:0/22:6)   | Glycerophospholipids | PC  | 0.92 | 0.07 | 0.82 | 0.05 | 2.62E-01 | 1.12 | 0.17  |
| PE(18:0/0:0)    | Glycerophospholipids | PC  | 1.13 | 0.10 | 1.14 | 0.06 | 9.38E-01 | 0.99 | -0.01 |
| PE(18:0/20:4)   | Glycerophospholipids | PC  | 1.05 | 0.04 | 1.03 | 0.03 | 7.65E-01 | 1.02 | 0.02  |
| PE(18:0/22:6)   | Glycerophospholipids | PC  | 1.12 | 0.11 | 0.84 | 0.06 | 5.64E-02 | 1.33 | 0.41  |
| PE(18:1/0:0)    | Glycerophospholipids | PC  | 1.33 | 0.11 | 1.92 | 0.10 | 2.54E-03 | 0.70 | -0.52 |
| PE(18:1/18:2)   | Glycerophospholipids | PC  | 0.81 | 0.13 | 1.75 | 0.22 | 2.36E-03 | 0.46 | -1.11 |
| PE(18:1e/22:4)  | Glycerophospholipids | PC  | 0.79 | 0.03 | 0.74 | 0.04 | 4.15E-01 | 1.06 | 0.09  |
| PE(18:2/0:0)    | Glycerophospholipids | PC  | 1.09 | 0.25 | 1.99 | 0.20 | 1.63E-02 | 0.55 | -0.87 |
| PE(18:2/0:0)    | Glycerophospholipids | PC  | 1.04 | 0.12 | 1.73 | 0.14 | 3.05E-03 | 0.60 | -0.73 |
| PE(18:2/18:2)   | Glycerophospholipids | PC  | 0.51 | 0.16 | 1.07 | 0.09 | 1.25E-02 | 0.48 | -1.06 |
| PE(20:3/0:0)    | Glycerophospholipids | PC  | 1.20 | 0.28 | 1.75 | 0.17 | 1.22E-01 | 0.69 | -0.54 |
| PE(20:4/0:0)    | Glycerophospholipids | PC  | 1.44 | 0.24 | 1.71 | 0.15 | 3.56E-01 | 0.84 | -0.25 |
| PE(20:5/16:0)   | Glycerophospholipids | PC  | 1.24 | 0.12 | 1.62 | 0.11 | 3.48E-02 | 0.76 | -0.39 |
| PE(22:4/0:0)    | Glycerophospholipids | PC  | 0.88 | 0.17 | 1.00 | 0.14 | 5.87E-01 | 0.88 | -0.18 |
| PE(22:6/0:0)    | Glycerophospholipids | PC  | 1.29 | 0.23 | 1.49 | 0.19 | 5.13E-01 | 0.86 | -0.21 |
| PE(38:5)        | Glycerophospholipids | PC  | 1.14 | 0.06 | 1.33 | 0.07 | 6.27E-02 | 0.86 | -0.22 |
| PE(O-16:0/0:0)  | Glycerophospholipids | PC  | 0.57 | 0.04 | 0.64 | 0.07 | 4.16E-01 | 0.89 | -0.17 |
| PE(O-16:0/18:1) | Glycerophospholipids | PC  | 0.86 | 0.05 | 1.04 | 0.06 | 3.61E-02 | 0.82 | -0.28 |
| PE(P-16:0/18:2) | Glycerophospholipids | PC  | 0.67 | 0.06 | 1.04 | 0.09 | 3.15E-03 | 0.64 | -0.64 |
| PE(P-16:0/20:4) | Glycerophospholipids | PC  | 0.76 | 0.03 | 0.83 | 0.04 | 2.28E-01 | 0.92 | -0.12 |
| PE(P-16:0/22:6) | Glycerophospholipids | PC  | 0.61 | 0.05 | 0.61 | 0.04 | 9.74E-01 | 1.00 | 0.00  |

|                                      |                      |     |      |      |      |      |          |      |       |
|--------------------------------------|----------------------|-----|------|------|------|------|----------|------|-------|
| PE(P-16:1/0:0)                       | Glycerophospholipids | PC  | 0.86 | 0.10 | 1.18 | 0.12 | 6.31E-02 | 0.73 | -0.46 |
| PE(P-18:0/0:0)                       | Glycerophospholipids | PC  | 1.04 | 0.11 | 1.08 | 0.06 | 7.27E-01 | 0.96 | -0.06 |
| PE(P-18:0/18:1)                      | Glycerophospholipids | PC  | 1.07 | 0.07 | 1.12 | 0.08 | 6.48E-01 | 0.95 | -0.07 |
| PE(P-18:0/20:4)                      | Glycerophospholipids | PC  | 1.04 | 0.04 | 1.02 | 0.04 | 8.01E-01 | 1.01 | 0.02  |
| PE(P-18:0/22:5) +<br>PE(P-20:1/20:4) | Glycerophospholipids | PC  | 0.98 | 0.04 | 0.97 | 0.05 | 9.19E-01 | 1.01 | 0.01  |
| PE(P-18:1/0:0)                       | Glycerophospholipids | PC  | 0.88 | 0.09 | 1.21 | 0.10 | 3.28E-02 | 0.73 | -0.46 |
| PE(P-18:1/20:4)                      | Glycerophospholipids | PC  | 0.85 | 0.03 | 0.90 | 0.03 | 2.25E-01 | 0.94 | -0.09 |
| PE(P-18:2/0:0)                       | Glycerophospholipids | PC  | 0.40 | 0.06 | 0.71 | 0.09 | 9.27E-03 | 0.56 | -0.84 |
| PE(P-20:0/20:4)                      | Glycerophospholipids | PC  | 0.95 | 0.08 | 0.75 | 0.06 | 7.37E-02 | 1.26 | 0.33  |
| PI(16:0/18:1)                        | Glycerophospholipids | PC  | 1.05 | 0.05 | 0.98 | 0.04 | 3.44E-01 | 1.07 | 0.09  |
| PI(16:0/18:2)                        | Glycerophospholipids | PC  | 1.15 | 0.08 | 1.21 | 0.08 | 6.49E-01 | 0.95 | -0.07 |
| PI(16:0/20:4)                        | Glycerophospholipids | PC  | 0.97 | 0.04 | 1.03 | 0.05 | 3.33E-01 | 0.94 | -0.09 |
| PI(18:0/18:2)                        | Glycerophospholipids | PC  | 0.97 | 0.11 | 0.96 | 0.07 | 9.32E-01 | 1.01 | 0.02  |
| PI(18:0/20:3)                        | Glycerophospholipids | PC  | 1.25 | 0.15 | 1.36 | 0.20 | 6.64E-01 | 0.92 | -0.12 |
| PI(18:0/20:4)                        | Glycerophospholipids | PC  | 1.06 | 0.05 | 1.02 | 0.05 | 5.30E-01 | 1.04 | 0.06  |
| PI(18:0/22:6)                        | Glycerophospholipids | PC  | 1.38 | 0.14 | 0.99 | 0.13 | 6.80E-02 | 1.39 | 0.47  |
| PI(18:1/20:4)                        | Glycerophospholipids | PC  | 0.75 | 0.10 | 0.76 | 0.06 | 9.36E-01 | 0.99 | -0.02 |
| SM(32:1)                             | Sphingolipids        | PC  | 0.58 | 0.02 | 0.58 | 0.02 | 9.59E-01 | 1.00 | 0.00  |
| SM(33:1)                             | Sphingolipids        | PC  | 1.03 | 0.08 | 1.37 | 0.08 | 7.37E-03 | 0.75 | -0.42 |
| SM(38:1)                             | Sphingolipids        | PC  | 0.99 | 0.06 | 1.07 | 0.04 | 3.05E-01 | 0.93 | -0.11 |
| SM(39:1)                             | Sphingolipids        | PC  | 1.04 | 0.10 | 1.34 | 0.05 | 2.51E-02 | 0.78 | -0.36 |
| SM(42:1)                             | Sphingolipids        | PC  | 0.99 | 0.08 | 1.17 | 0.06 | 9.57E-02 | 0.85 | -0.24 |
| SM(42:3)                             | Sphingolipids        | PC  | 0.56 | 0.03 | 0.73 | 0.04 | 6.73E-03 | 0.77 | -0.37 |
| SM(d16:1/24:1)                       | Sphingolipids        | PC  | 1.39 | 0.13 | 1.69 | 0.14 | 1.57E-01 | 0.83 | -0.28 |
| SM(d18:0/16:0)                       | Sphingolipids        | PC  | 1.13 | 0.10 | 1.34 | 0.08 | 1.22E-01 | 0.84 | -0.25 |
| SM(d18:0/18:0)                       | Sphingolipids        | PC  | 0.78 | 0.07 | 0.74 | 0.05 | 6.23E-01 | 1.06 | 0.08  |
| SM(d18:0/22:0)                       | Sphingolipids        | PC  | 0.97 | 0.07 | 1.25 | 0.09 | 2.36E-02 | 0.78 | -0.37 |
| SM(d18:1/16:0)                       | Sphingolipids        | PC  | 1.14 | 0.05 | 1.20 | 0.03 | 3.09E-01 | 0.95 | -0.07 |
| SM(d18:1/17:0)                       | Sphingolipids        | PC  | 0.71 | 0.08 | 0.97 | 0.14 | 1.12E-01 | 0.74 | -0.44 |
| SM(d18:1/18:0)                       | Sphingolipids        | PC  | 0.78 | 0.05 | 0.75 | 0.03 | 5.76E-01 | 1.04 | 0.06  |
| SM(d18:1/22:0)                       | Sphingolipids        | PC  | 1.13 | 0.06 | 1.21 | 0.04 | 2.56E-01 | 0.93 | -0.11 |
| SM(d18:1/23:0)                       | Sphingolipids        | PC  | 1.04 | 0.07 | 1.29 | 0.04 | 1.03E-02 | 0.81 | -0.31 |
| SM(d18:1/23:1)                       | Sphingolipids        | PC  | 1.32 | 0.13 | 1.71 | 0.11 | 5.04E-02 | 0.78 | -0.37 |
| SM(d18:1/24:1)                       | Sphingolipids        | LPC | 1.03 | 0.06 | 1.17 | 0.04 | 8.44E-02 | 0.88 | -0.18 |
| SM(d18:2/16:0)                       | Sphingolipids        | LPC | 0.71 | 0.03 | 0.79 | 0.03 | 8.63E-02 | 0.90 | -0.15 |
| SM(d18:2/20:0)                       | Sphingolipids        | LPC | 0.70 | 0.06 | 0.90 | 0.06 | 3.40E-02 | 0.78 | -0.35 |
| SM(d18:2/22:0)                       | Sphingolipids        | LPC | 0.39 | 0.04 | 0.41 | 0.05 | 8.38E-01 | 0.97 | -0.05 |
| SM(d18:2/23:0)                       | Sphingolipids        | LPC | 0.55 | 0.03 | 0.75 | 0.05 | 4.90E-03 | 0.73 | -0.46 |
| Taurolithocholic<br>acid             | Bile acids           | LPC | 1.70 | 0.34 | 1.43 | 0.25 | 5.31E-01 | 1.19 | 0.25  |
| Tauroursodeoxych<br>olic acid        | Bile acids           | LPC | 1.94 | 0.17 | 1.52 | 0.18 | 1.11E-01 | 1.28 | 0.35  |



|          |               |     |      |      |      |      |          |      |       |
|----------|---------------|-----|------|------|------|------|----------|------|-------|
| TG(42:0) | Glycerolipids | LPC | 0.08 | 0.01 | 0.05 | 0.01 | 5.25E-03 | 1.56 | 0.64  |
| TG(42:1) | Glycerolipids | LPC | 0.11 | 0.01 | 0.06 | 0.00 | 9.01E-03 | 1.88 | 0.91  |
| TG(44:0) | Glycerolipids | LPC | 0.34 | 0.03 | 0.16 | 0.02 | 4.79E-04 | 2.04 | 1.03  |
| TG(44:1) | Glycerolipids | LPC | 0.23 | 0.04 | 0.10 | 0.01 | 7.55E-03 | 2.32 | 1.21  |
| TG(44:2) | Glycerolipids | LPC | 0.09 | 0.01 | 0.05 | 0.00 | 1.21E-02 | 1.73 | 0.79  |
| TG(45:0) | Glycerolipids | LPC | 1.07 | 0.06 | 0.87 | 0.03 | 9.21E-03 | 1.24 | 0.31  |
| TG(46:0) | Glycerolipids | LPC | 1.36 | 0.20 | 0.43 | 0.06 | 1.82E-03 | 3.15 | 1.66  |
| TG(46:1) | Glycerolipids | LPC | 1.14 | 0.21 | 0.34 | 0.04 | 6.31E-03 | 3.36 | 1.75  |
| TG(46:2) | Glycerolipids | LPC | 0.48 | 0.11 | 0.19 | 0.01 | 3.56E-02 | 2.51 | 1.33  |
| TG(46:3) | Glycerolipids | LPC | 0.26 | 0.04 | 0.19 | 0.02 | 2.07E-01 | 1.35 | 0.44  |
| TG(47:0) | Glycerolipids | LPC | 1.67 | 0.30 | 0.90 | 0.07 | 4.08E-02 | 1.84 | 0.88  |
| TG(47:1) | Glycerolipids | LPC | 1.95 | 0.43 | 0.90 | 0.07 | 4.39E-02 | 2.17 | 1.12  |
| TG(48:0) | Glycerolipids | LPC | 2.76 | 0.40 | 0.61 | 0.13 | 7.74E-04 | 4.53 | 2.18  |
| TG(48:1) | Glycerolipids | LPC | 2.54 | 0.38 | 0.65 | 0.13 | 1.13E-03 | 3.91 | 1.97  |
| TG(48:2) | Glycerolipids | LPC | 2.20 | 0.42 | 0.69 | 0.11 | 8.16E-03 | 3.19 | 1.67  |
| TG(48:3) | Glycerolipids | LPC | 0.95 | 0.22 | 0.55 | 0.04 | 1.17E-01 | 1.73 | 0.79  |
| TG(48:4) | Glycerolipids | LPC | 0.19 | 0.04 | 0.23 | 0.03 | 4.90E-01 | 0.84 | -0.25 |
| TG(49:0) | Glycerolipids | LPC | 2.53 | 0.54 | 0.88 | 0.11 | 1.81E-02 | 2.88 | 1.53  |
| TG(49:1) | Glycerolipids | LPC | 2.81 | 0.71 | 1.07 | 0.12 | 4.43E-02 | 2.62 | 1.39  |
| TG(49:2) | Glycerolipids | LPC | 2.33 | 0.58 | 1.24 | 0.10 | 1.06E-01 | 1.87 | 0.91  |
| TG(49:3) | Glycerolipids | LPC | 1.73 | 0.41 | 1.45 | 0.07 | 5.29E-01 | 1.19 | 0.25  |
| TG(50:0) | Glycerolipids | LPC | 2.99 | 0.64 | 0.57 | 0.09 | 6.57E-03 | 5.22 | 2.38  |
| TG(50:1) | Glycerolipids | LPC | 2.26 | 0.26 | 0.91 | 0.12 | 5.99E-04 | 2.48 | 1.31  |
| TG(50:2) | Glycerolipids | LPC | 2.12 | 0.23 | 1.08 | 0.13 | 2.59E-03 | 1.96 | 0.97  |
| TG(50:3) | Glycerolipids | LPC | 1.81 | 0.24 | 1.24 | 0.10 | 5.77E-02 | 1.46 | 0.54  |
| TG(50:4) | Glycerolipids | LPC | 1.09 | 0.25 | 0.96 | 0.06 | 6.22E-01 | 1.14 | 0.19  |
| TG(50:5) | Glycerolipids | LPC | 0.63 | 0.12 | 0.69 | 0.05 | 6.38E-01 | 0.91 | -0.14 |
| TG(51:1) | Glycerolipids | LPC | 2.65 | 0.57 | 1.15 | 0.14 | 3.40E-02 | 2.30 | 1.20  |
| TG(51:2) | Glycerolipids | LPC | 2.57 | 0.66 | 1.45 | 0.16 | 1.41E-01 | 1.77 | 0.82  |
| TG(51:3) | Glycerolipids | LPC | 1.68 | 0.43 | 1.74 | 0.19 | 9.00E-01 | 0.97 | -0.05 |
| TG(51:4) | Glycerolipids | LPC | 1.18 | 0.25 | 1.74 | 0.21 | 1.16E-01 | 0.68 | -0.56 |
| TG(52:0) | Glycerolipids | LPC | 1.41 | 0.30 | 0.61 | 0.05 | 3.22E-02 | 2.30 | 1.20  |
| TG(52:1) | Glycerolipids | LPC | 2.88 | 0.54 | 0.79 | 0.09 | 5.89E-03 | 3.63 | 1.86  |
| TG(52:5) | Glycerolipids | LPC | 1.31 | 0.27 | 1.74 | 0.15 | 2.10E-01 | 0.75 | -0.41 |
| TG(53:1) | Glycerolipids | PI  | 1.55 | 0.21 | 0.77 | 0.12 | 8.40E-03 | 2.02 | 1.02  |
| TG(53:2) | Glycerolipids | PI  | 1.71 | 0.30 | 1.39 | 0.12 | 3.54E-01 | 1.22 | 0.29  |
| TG(53:3) | Glycerolipids | PI  | 1.28 | 0.26 | 1.45 | 0.14 | 5.74E-01 | 0.88 | -0.19 |
| TG(53:4) | Glycerolipids | PI  | 0.99 | 0.18 | 1.51 | 0.16 | 5.76E-02 | 0.66 | -0.60 |
| TG(54:0) | Glycerolipids | PI  | 0.83 | 0.05 | 1.03 | 0.18 | 3.27E-01 | 0.81 | -0.31 |
| TG(54:1) | Glycerolipids | PI  | 1.19 | 0.18 | 0.71 | 0.06 | 3.45E-02 | 1.67 | 0.74  |
| TG(54:2) | Glycerolipids | PI  | 1.70 | 0.32 | 1.01 | 0.10 | 7.36E-02 | 1.68 | 0.75  |



|            |                      |                               |      |      |      |      |          |      |       |
|------------|----------------------|-------------------------------|------|------|------|------|----------|------|-------|
| TG(54:3)   | Glycerolipids        | PI                            | 1.08 | 0.10 | 1.23 | 0.09 | 2.81E-01 | 0.88 | -0.19 |
| TG(54:4)   | Glycerolipids        | Cer                           | 0.77 | 0.08 | 1.24 | 0.12 | 5.06E-03 | 0.62 | -0.69 |
| TG(54:5)   | Glycerolipids        | Cer                           | 0.69 | 0.09 | 1.39 | 0.16 | 1.58E-03 | 0.50 | -1.00 |
| TG(54:5)   | Glycerolipids        | Cer                           | 0.95 | 0.22 | 0.75 | 0.09 | 4.29E-01 | 1.26 | 0.34  |
| TG(54:6)   | Glycerolipids        | Cer                           | 0.63 | 0.15 | 1.66 | 0.31 | 8.35E-03 | 0.38 | -1.40 |
| TG(54:6)   | Glycerolipids        | Cer                           | 0.65 | 0.15 | 0.77 | 0.13 | 5.46E-01 | 0.84 | -0.26 |
| TG(54:7)   | Glycerolipids        | SM                            | 0.71 | 0.18 | 1.95 | 0.40 | 1.18E-02 | 0.36 | -1.47 |
| TG(54:7)   | Glycerolipids        | SM                            | 0.78 | 0.14 | 1.01 | 0.14 | 2.70E-01 | 0.77 | -0.37 |
| TG(56:0)   | Glycerolipids        | SM                            | 0.93 | 0.05 | 0.97 | 0.05 | 5.89E-01 | 0.96 | -0.06 |
| TG(56:1)   | Glycerolipids        | SM                            | 0.82 | 0.07 | 0.90 | 0.05 | 4.18E-01 | 0.92 | -0.12 |
| TG(56:2)   | Glycerolipids        | SM                            | 0.76 | 0.13 | 0.83 | 0.08 | 6.89E-01 | 0.92 | -0.12 |
| TG(56:3)   | Glycerolipids        | SM                            | 0.67 | 0.16 | 0.94 | 0.14 | 2.41E-01 | 0.72 | -0.47 |
| TG(56:5)   | Glycerolipids        | SM                            | 0.63 | 0.11 | 0.88 | 0.11 | 1.24E-01 | 0.72 | -0.48 |
| TG(56:6)   | Glycerolipids        | SM                            | 0.39 | 0.11 | 0.40 | 0.08 | 9.56E-01 | 0.98 | -0.03 |
| TG(56:7)   | Glycerolipids        | SM                            | 0.34 | 0.08 | 0.62 | 0.12 | 7.89E-02 | 0.56 | -0.83 |
| TG(56:7)   | Glycerolipids        | SM                            | 0.68 | 0.12 | 0.59 | 0.06 | 5.08E-01 | 1.17 | 0.22  |
| TG(56:8)   | Glycerolipids        | SM                            | 0.22 | 0.06 | 0.64 | 0.17 | 4.95E-02 | 0.35 | -1.52 |
| TG(56:8)   | Glycerolipids        | SM                            | 0.62 | 0.14 | 0.74 | 0.12 | 5.41E-01 | 0.84 | -0.25 |
| TG(58:1)   | Glycerolipids        | SM                            | 1.12 | 0.14 | 0.95 | 0.07 | 3.26E-01 | 1.18 | 0.23  |
| TG(58:10)  | Glycerolipids        | SM                            | 0.19 | 0.04 | 0.41 | 0.10 | 6.61E-02 | 0.47 | -1.10 |
| TG(58:2)   | Glycerolipids        | SM                            | 0.91 | 0.13 | 0.95 | 0.12 | 8.29E-01 | 0.96 | -0.06 |
| TG(58:3)   | Glycerolipids        | SM                            | 0.68 | 0.13 | 1.04 | 0.16 | 1.06E-01 | 0.66 | -0.60 |
| TG(58:6)   | Glycerolipids        | SM                            | 0.22 | 0.06 | 0.23 | 0.04 | 9.03E-01 | 0.96 | -0.06 |
| TG(58:7)   | Glycerolipids        | SM                            | 0.19 | 0.06 | 0.28 | 0.05 | 2.82E-01 | 0.68 | -0.56 |
| TG(58:9)   | Glycerolipids        | SM                            | 0.23 | 0.05 | 0.41 | 0.09 | 9.52E-02 | 0.57 | -0.80 |
| TG(60:2)   | Glycerolipids        | SM                            | 1.16 | 0.24 | 1.14 | 0.19 | 9.50E-01 | 1.02 | 0.03  |
| TG(60:3)   | Glycerolipids        | SM                            | 0.74 | 0.14 | 1.03 | 0.13 | 1.56E-01 | 0.72 | -0.47 |
| x-HETE/EET | Oxidized fatty acids | CMH                           | 0.05 | 0.00 | 0.05 | 0.01 | 7.78E-01 | 0.94 | -0.09 |
| x-HODE     | Oxidized fatty acids | CMH                           | 0.38 | 0.06 | 0.54 | 0.05 | 5.61E-02 | 0.70 | -0.51 |
| x-HODE     | Oxidized fatty acids | Hydroxy-octadecadienoic acids | 0.76 | 0.14 | 1.15 | 0.17 | 9.81E-02 | 0.66 | -0.60 |

Each metabolite is shown as a line whose color is defined by the sign and magnitude of the change. Adjacent column to each comparison shows the results of the t test (P value). Color scales are shown in the right: upper scale: Log<sub>2</sub> fold-change; lower scale: statistical significance (n: HF/SD=7, n: HF/RD=8). Cer, ceramides; ChoE, cholesterol esters; DAG, diglycerides; oxFFA, oxidized free fatty acids; LPC, lysophosphatidylcholines; LPE, lysophosphatidylethanolamines; PC, phosphatidylcholines; PE, phosphatidylethanolamines; PI, phosphatidylinositols; MUFA, monounsaturated fatty acids; PUFA, polyunsaturated fatty acids; SFA, saturated fatty acids; SM, sphingomyelins; TAG, triacylglycerols.

“Individual notation” refers to the confirmed identification of the metabolites. Overlapping of two or more metabolites or non-confirmed identification is indicated in “Individual composition (or probable ID)”. Fold-changes and unpaired Student’s *t* test *p*-values (or Welch’s *t* test where unequal variances were found) were calculated for each comparison considering 3 cell cultures per group. Regarding sphingolipids, dA:B represents the sphingoid base: d18:1, sphingosine; d18:2, sphingadiene; d18:0, sphinganine. For glycerophospholipids containing an ether moiety the prefix, O-, denotes the presence of an alkyl ether (plasmanyl) substituent, whereas the prefix P- refers to a vinyl ether (alkenyl or plasmenyl) substituent. The suffix, e, indicates the presence of an ether linked substituent, although plasmanyl or plasmenyl classification has not been confirmed. An “x” in the name of some NEFA, FAA and NAE indicates the unknown position the double bounds, i.e., 18:1n-x for FFA09. Most of the oxFA are not identified, but sub-classified as Hydroxy-eicosatetraenoic acids, Epoxy-eicosatetraenoic acids, Hydroxy-octadecadenoic acids, Oxo-octadecadenoic acids or Dihydroxyeicosatrienoic acids.
